# Supplementary material for: LINC01234/MicroRNA-31-5p/MAGEA3 Axis Mediates the Proliferation and Chemoresistance of Hepatocellular Carcinoma Cells
Source: PubMed Central journal article supplement — Mol Ther Nucleic Acids. 2019 Nov 13;19:168–78. doi: 10.1016/j.omtn.2019.10.035 (PMC6926330; doi:10.1016/j.omtn.2019.10.035), 2019-11-13
Supplement: mmc1.pdf [file mmc1.pdf]

OMTN, Volume 19

## **Supplemental Information**

**LINC01234/MicroRNA-31-5p/MAGEA3 Axis**

**Mediates the Proliferation and Chemoresistance**

**of Hepatocellular Carcinoma Cells**

**Yunhao Chen, Hui Zhao, Haibo Li, Xiao Feng, Hui Tang, Jianwen Zhang, Binsheng Fu, and Chunhui Qiu**

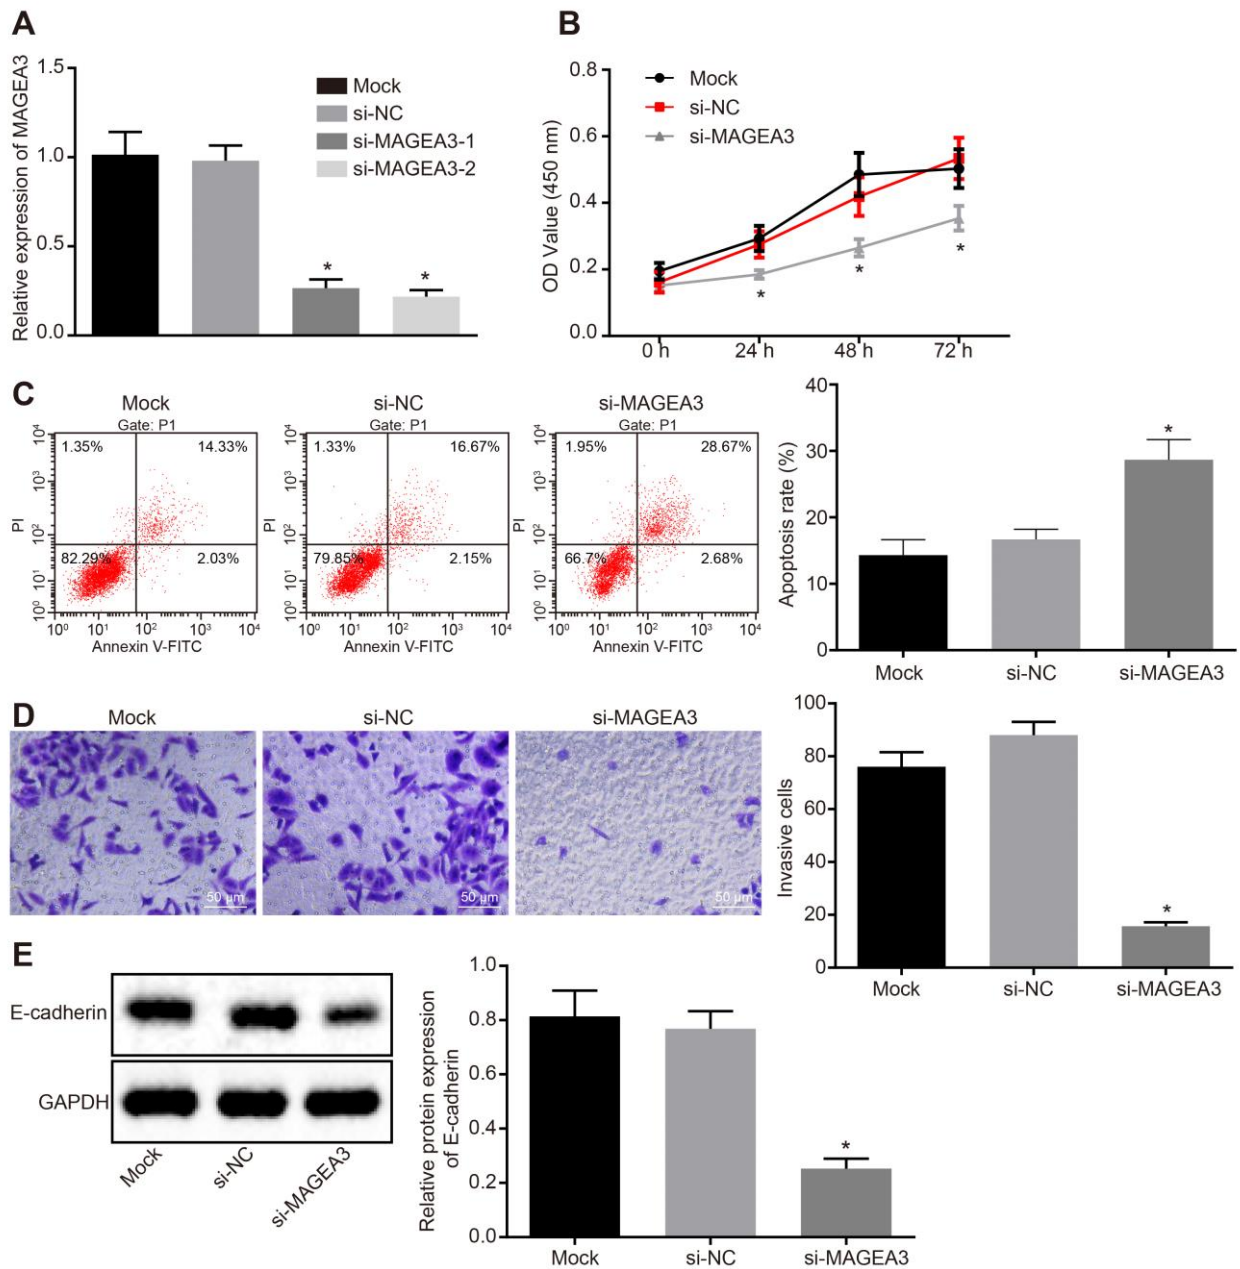

**Supplementary Figure 1.** Depleted MAGEA3 represses the proliferation and invasion but potentiates the apoptosis of Huh7 cells. A, transfection efficiency of siRNAs targeting MAGEA3 (si-MAGEA3-1, si-MAGEA3-2, si-MAGEA3-3) in Huh7 cells determined using RT-qPCR; B-D, viability (B), apoptosis (C) and invasion ( $\times 200$ ; D) of Huh7 cells in response to MAGEA3 depletion, as measured using MTT assay, flow cytometry and Transwell assay, respectively; E, protein expression of E-cadherin in Huh7 cells in response to MAGEA3 depletion measured using Western blot analysis. Measurement data were expressed as mean  $\pm$  standard deviation. Data in panel B were analyzed using repeated-measures ANOVA along with Tuckey's post hoc test and data among groups in other panels were compared using one-way NAOVA together with Tuckey's

post hoc test. The experiment was repeated three times.  $*p < 0.05$  vs. mock- or si-NC-transfected Huh7 cells.

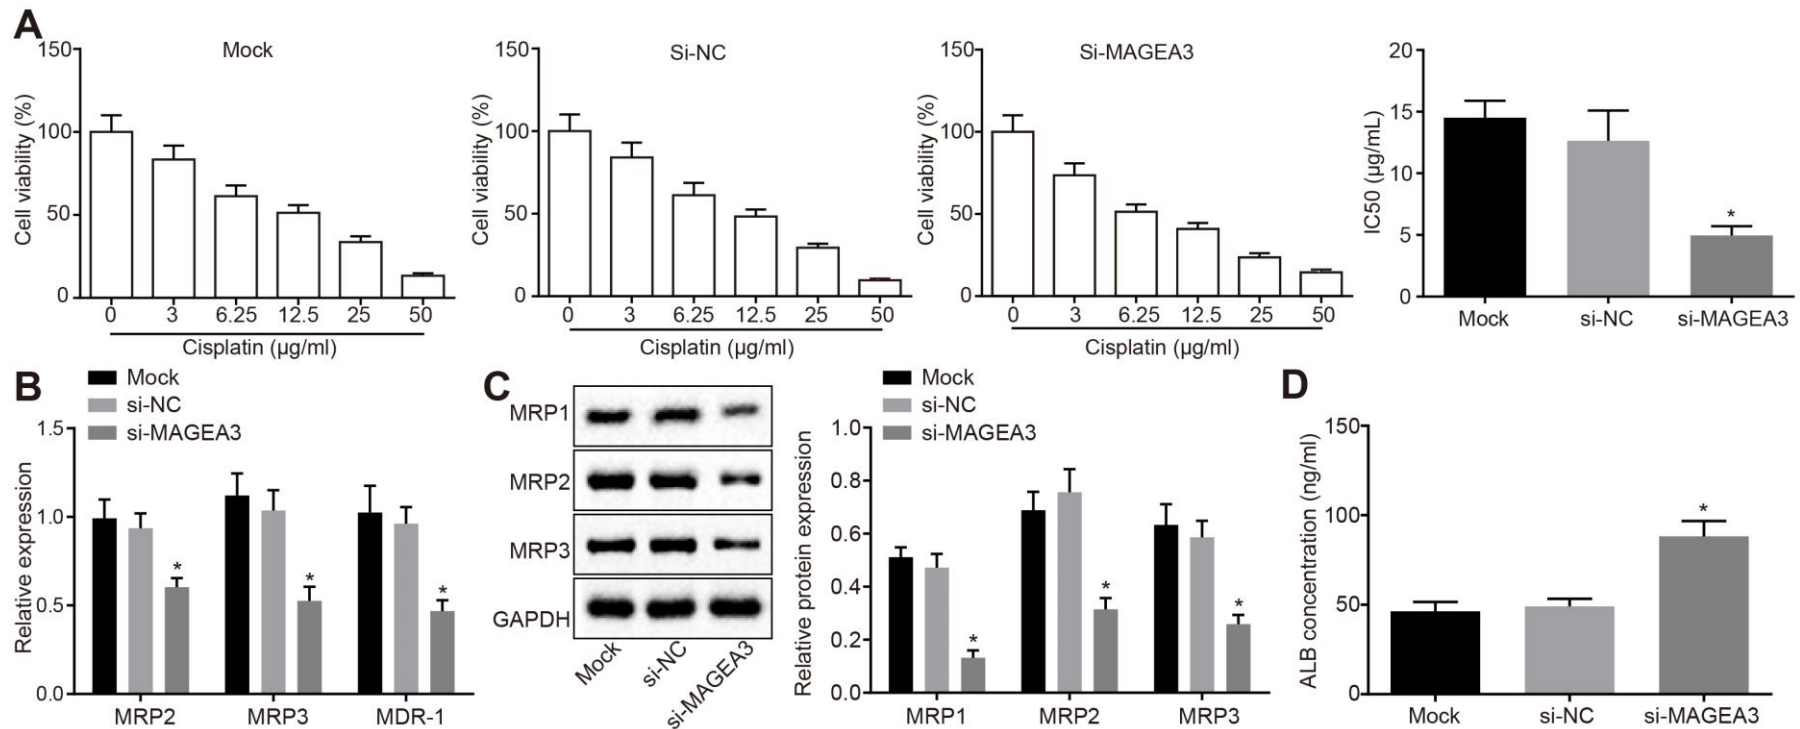

**Supplementary Figure 2.** MAGEA3 silencing reduces chemoresistance of Huh7 cells to cisplatin. A, CCK-8 assay showing viability and the IC<sub>50</sub> of Huh7 cells transfected with mock, si-NC or si-MAGEA3 upon treatment with cisplatin at different concentrations; B, the mRNA levels of MRP2, MRP3 and MDR1 in Huh7 cells following silencing of MAGEA3 determined by RT-qPCR; C, the protein levels of MRP2, MRP3, and MDR1 in Huh7 cells transfected with si-MAGEA3 measured by Western blot analysis. D, ALB content in the supernatant of Huh7 cells in response to si-MAGEA3 transfection detected by ELISA. Measurement data were expressed as mean  $\pm$  standard deviation. The comparisons among multiple groups were assessed with one-way ANOVA, followed by Tukey's post hoc test. Each experiment was repeated three times. \*  $p < 0.05$  vs. the mock- or si-NC-transfected Huh7 cells.

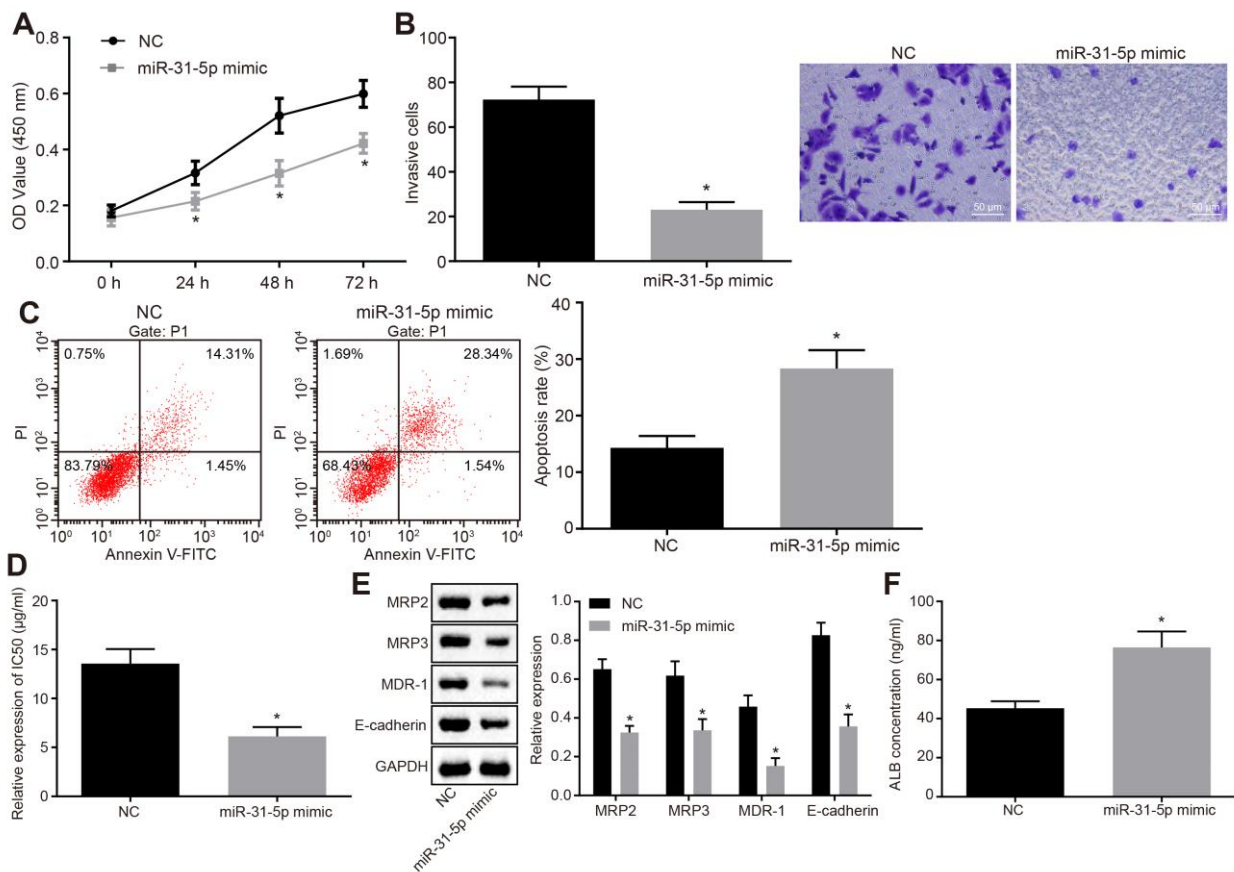

**Supplementary Figure 3.** miR-31-5p dampens Huh7 cell proliferation and reduces chemoresistance to cisplatin. A-C, viability (A), invasion ( $\times 200$ ; B) and cisplatin-induced apoptosis (C) of Huh7 cells in response to miR-31-5p mimic transfection using MTT assay, Transwell assay and flow cytometry, respectively; D, IC<sub>50</sub> value of Huh7 cells in response to miR-31-5p mimic transfection; E, protein expression of MRP2, MRP3, MDR-1, and E-cadherin in Huh7 cells in response to miR-31-5p mimic transfection measured by Western blot analysis; F, content of ALB in the supernatant of Huh7 cells in response to miR-31-5p mimic transfection detected using ELISA. Measurement data were expressed as mean  $\pm$  standard deviation. The comparison between two groups was analyzed by independent sample *t*-test and the comparisons among multiple groups by one-way ANOVA, followed by Tukey's post hoc test. Data in panel C were analyzed using repeated-measures ANOVA with Tukey's post hoc test. Each experiment was repeated three times. \*  $p < 0.05$  vs. NC-transfected Huh7 cells.

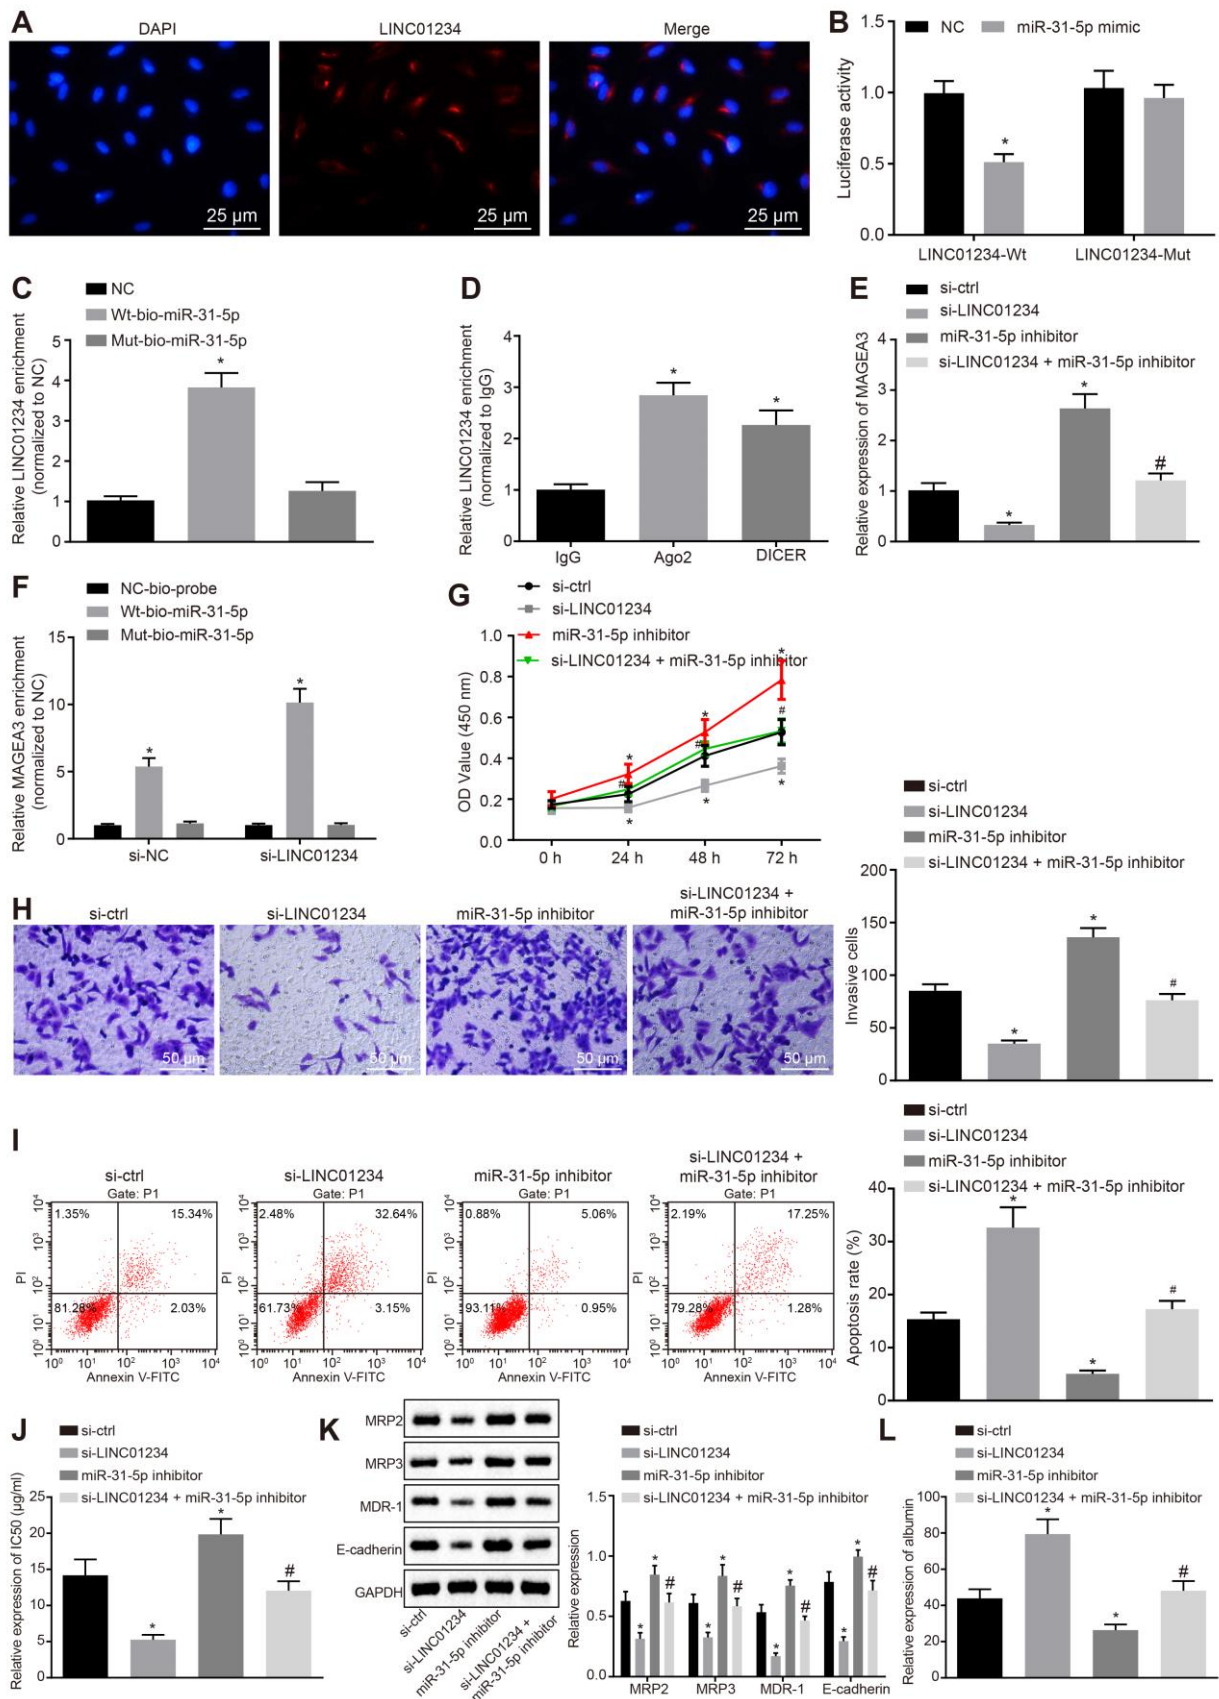

**Supplementary Figure 4.** Reduction of LINC01234, results in suppression of HCC progression via miR-31-5p-mediated inhibition of MAGEA3. A, the subcellular localization of LINC01234 in Huh7 cells detected using FISH ( $\times 400$ ); B, the luciferase activity of LINC01234 in Huh7 cells

upon miR-31-5p mimic transfection detected by dual-luciferase reporter gene assay; C, the binding between LINC01234 and miR-31-5p in Huh7 cells detected by RNA pull-down assay; D, the binding between LINC01234 and Ago2 or DICER in Huh7 cells detected by RIP assay; E, MAGEA3 expression in Huh7 cells measured using RT-qPCR; F, binding of miR-31-5p to MAGEA3 in Huh7 cells detected using RNA pull-down; G-I, the viability (G), invasion ( $\times 200$ ; H) and cisplatin-induced apoptosis (I) of Huh7 cells upon silence of LINC01234 and/or miR-31-5p evaluated by MTT assay, Transwell assay ( $\times 200$ ) and flow cytometry, respectively; J,  $IC_{50}$  value of Huh7 cells upon silence of LINC01234 and/or miR-31-5p; K, protein expression of MRP2, MRP3, MDR-1, and E-cadherin in Huh7 cells determined using Western blot analysis; L, content of ALB in the supernatant of Huh7 cells detected by ELISA. Measurement data were expressed as mean  $\pm$  standard deviation. Differences among groups at different points of time were assessed with repeated-measures ANOVA. The comparison between two groups was analyzed by independent sample *t*-test and the comparisons among multiple groups by one-way ANOVA, followed by Tukey's post hoc test. Each experiment was repeated three times. \* $p < 0.05$  vs. the IgG immunoprecipitates or the NC- or si-ctrl-transfected cells; # $p < 0.05$  vs. the si-LINC01234-transfected cells.
